# Supplementary material
Source: ML conference proceedings conference paper supplement (https://openreview.net/forum?id=TSwEOuoO00)

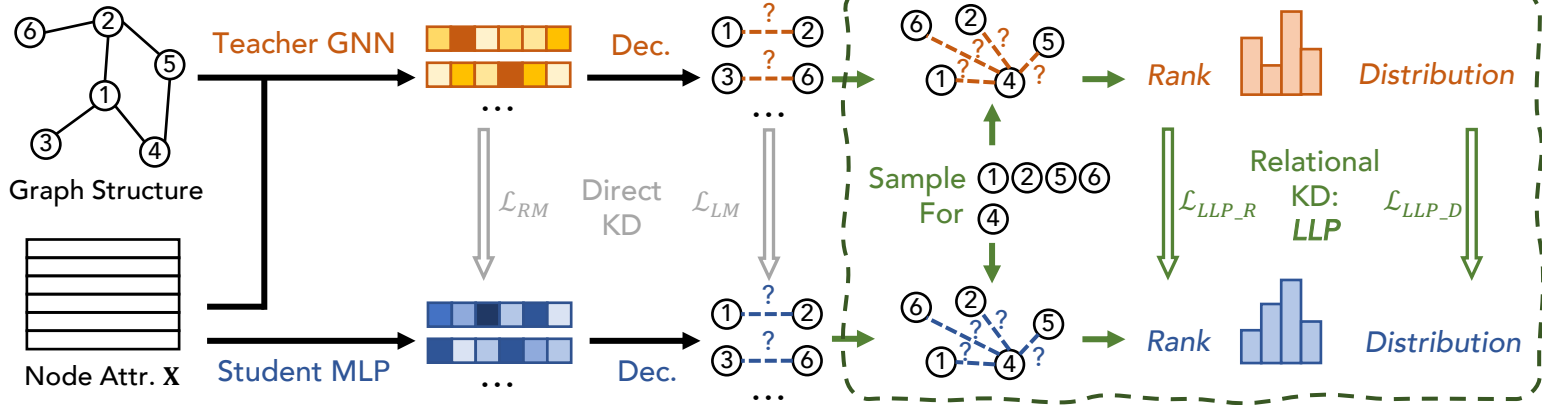

Supplement: supplementary_material [file LLP.pdf › linkless-link-prediction/LLP.pdf]
